# Supplementary material
Source: PubMed Central journal article supplement (PMC4597781)
Supplement: NIHMS696096-supplement-1.pdf [file NIHMS696096-supplement-1.pdf]

Figure S1; Related to Figure 1

Real Time PCR

A. PCR Array

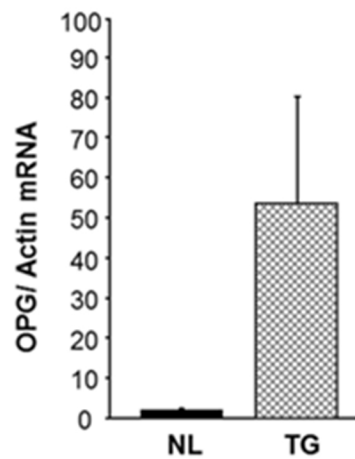

B. Islets

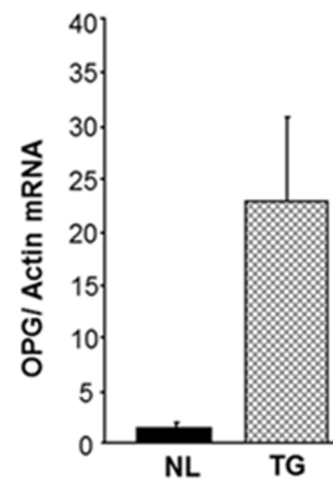

C. INS1 Cells

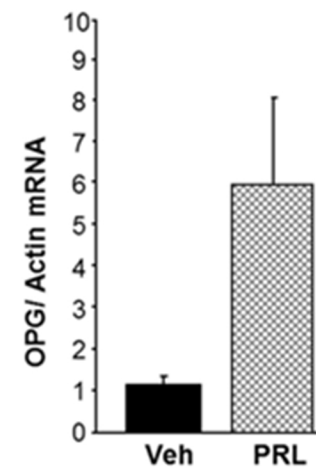

D. Western Blots

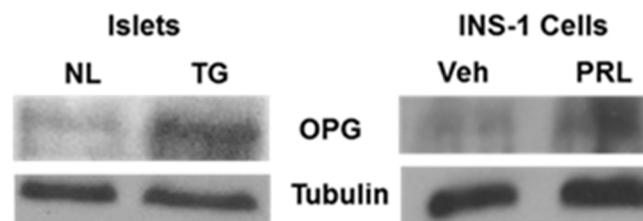

Figure S2; Related to Figure 1

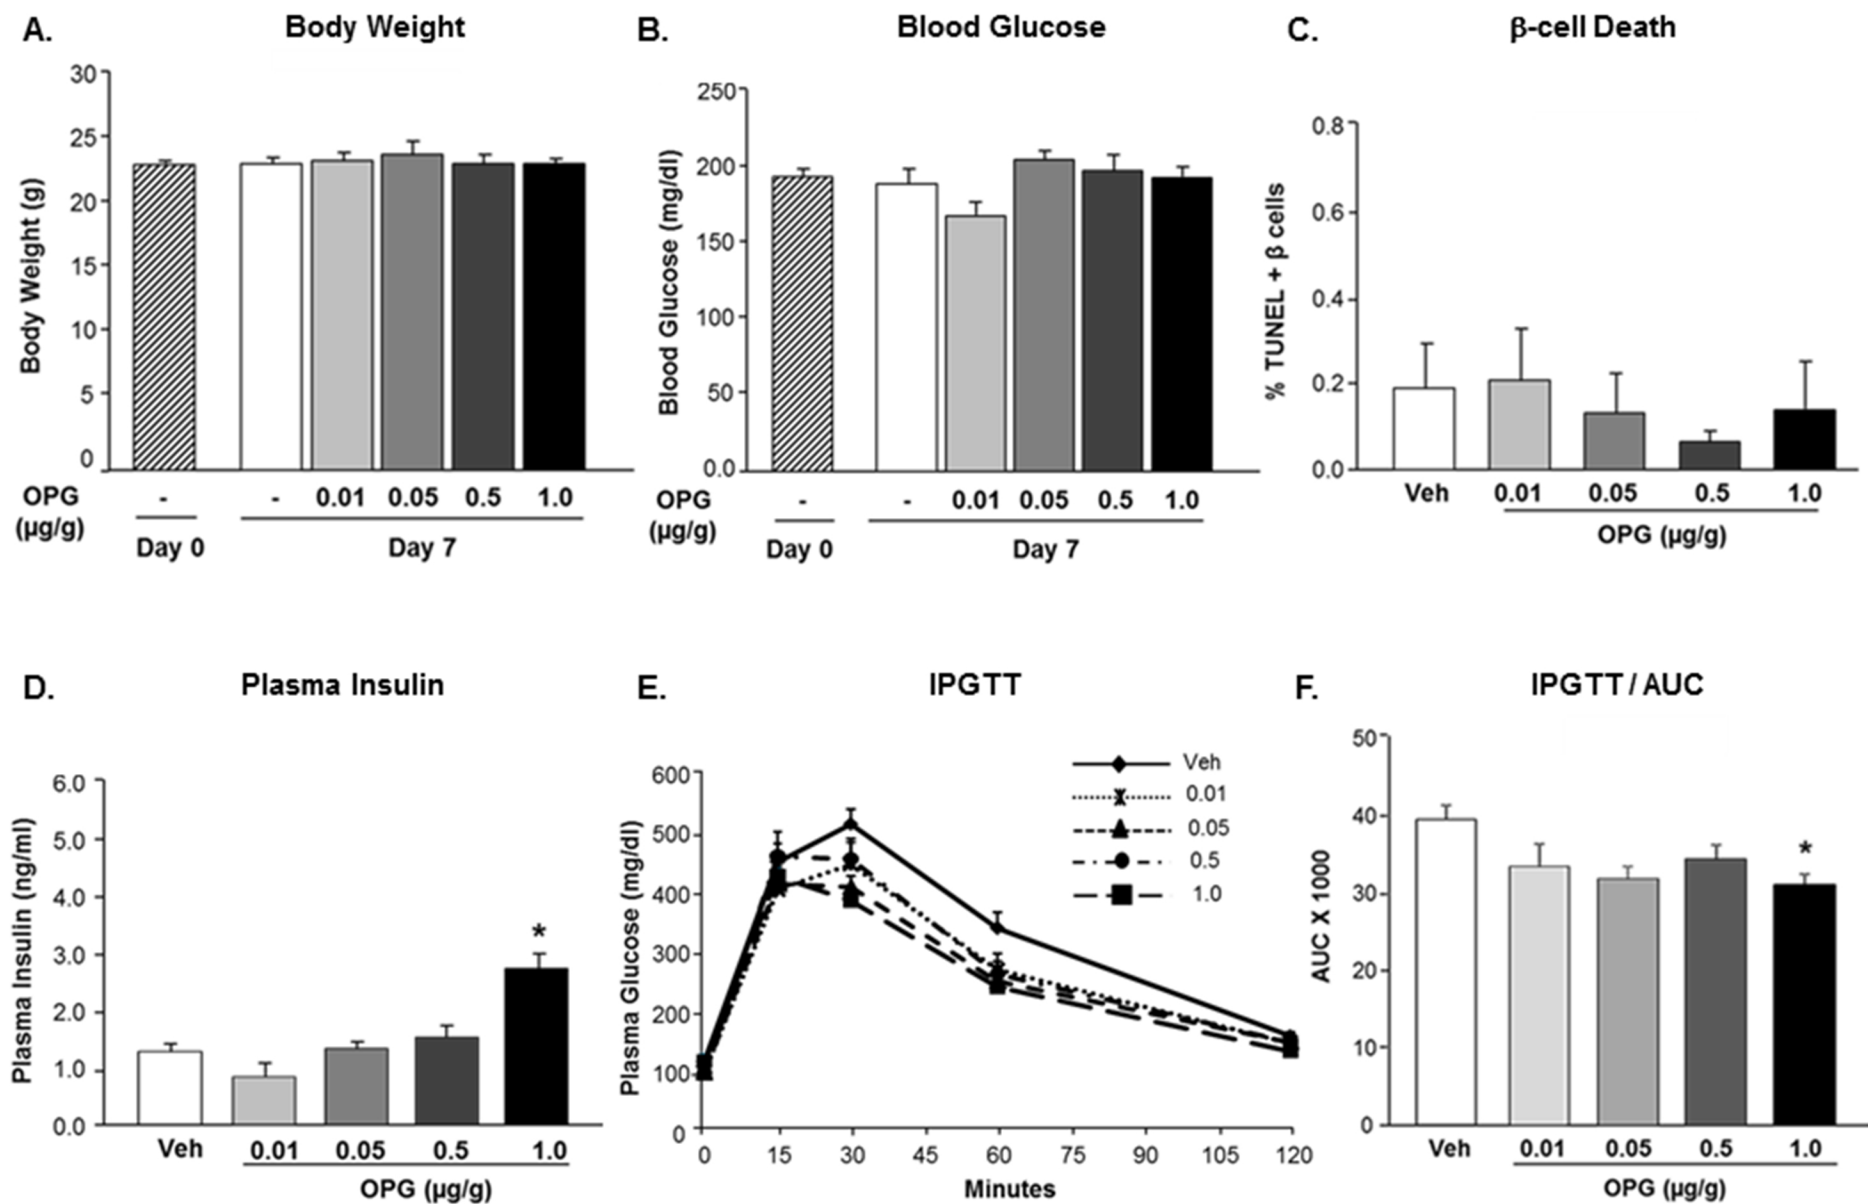

Figure S3; Related to Figure 1

A. Body Weight

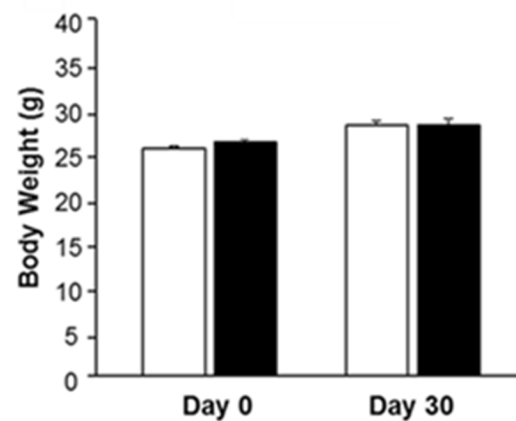

B. Blood Glucose

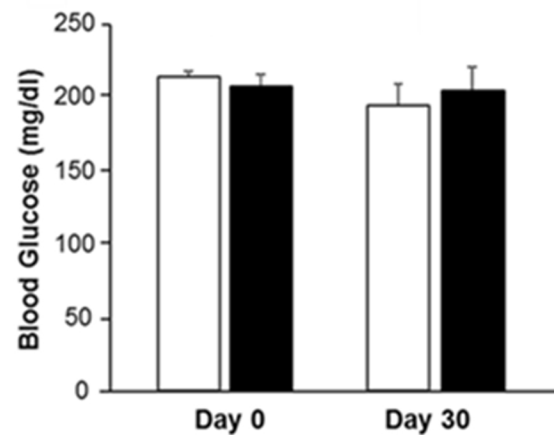

C.  $\beta$ -cell Death

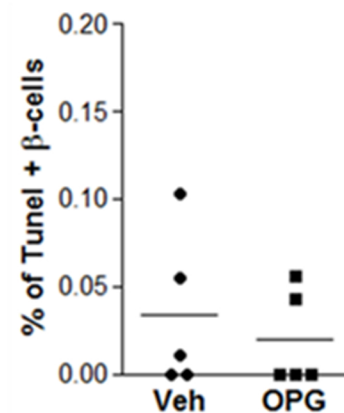

D. IPGTT

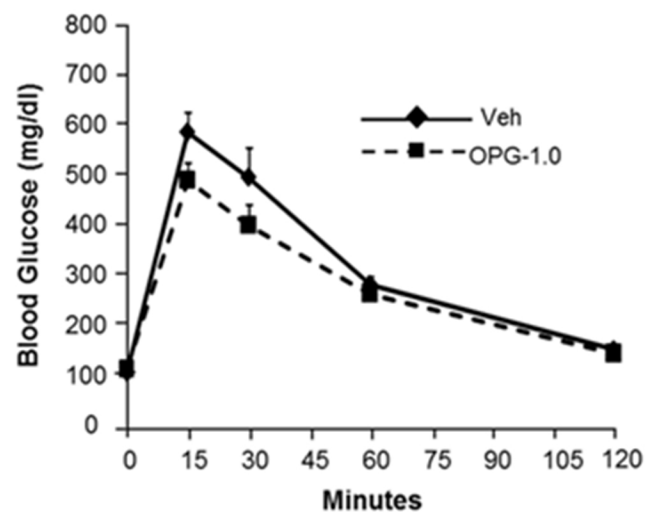

E. IPGTT/AUC

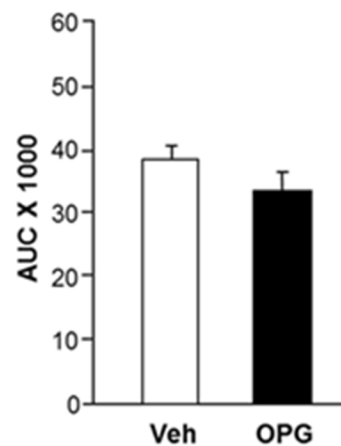

F. ITT

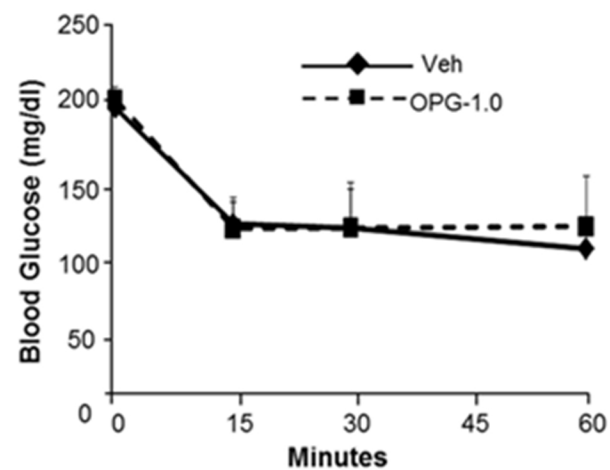

Figure S4; Related to Figure 2

**A. mRNA Expression – Human Islets**

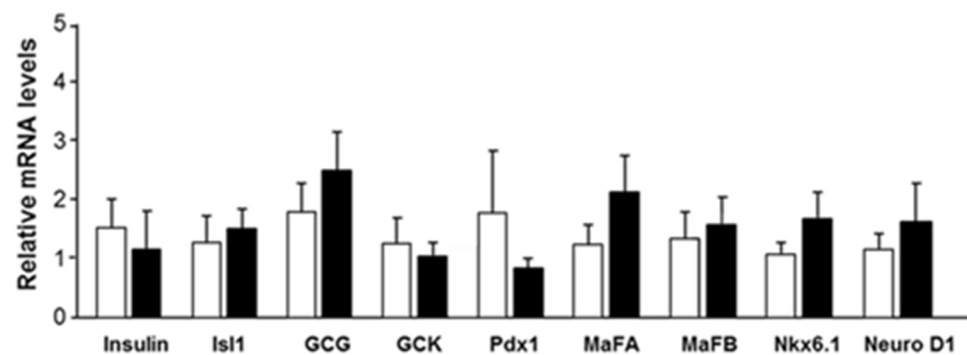

**B. Insulin Content - Human Islets**

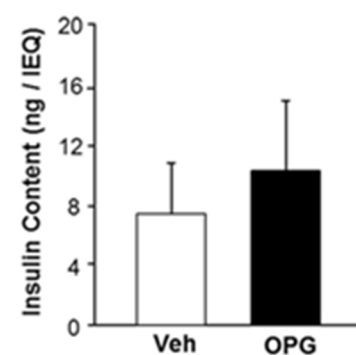

**C. Nkx6.1 / Ki67 – Human Islets**

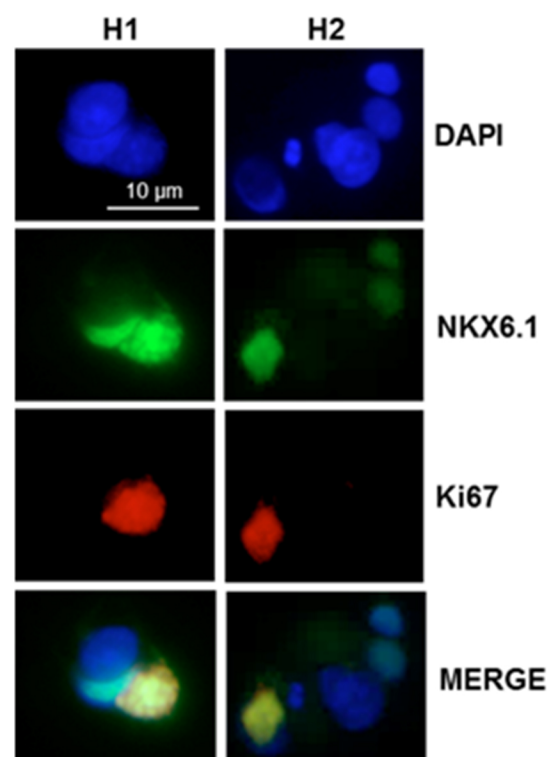

**D.**

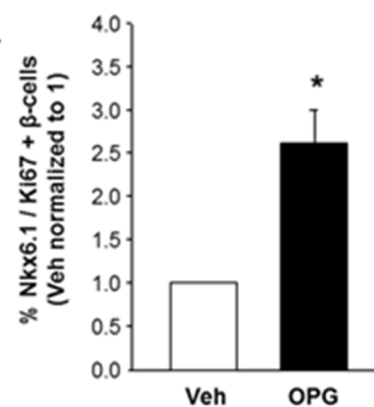

**F.**

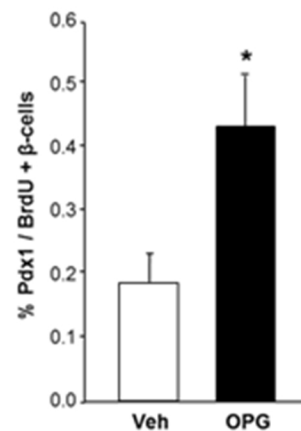

**E. Pdx1 / BrdU – Mouse Islets**

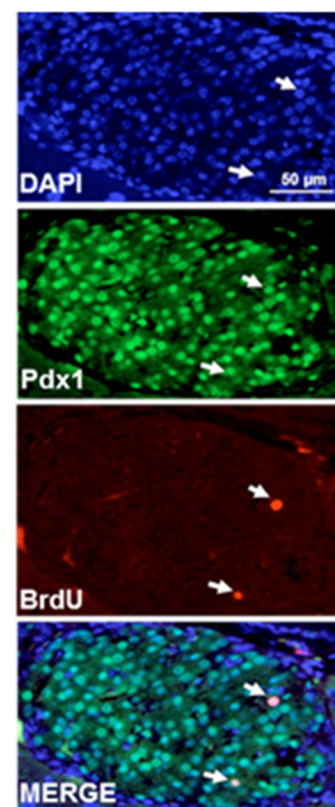

## **SUPPLEMENTAL FIGURE LEGENDS:**

### **Figure S1, related to Figure 1. OPG is a novel target of lactogens in $\beta$ -cells.**

**(A)** PCR-array and **(B)** Real time PCR analysis of the ratio of OPG/actin mRNA in islets from normal (NL) and transgenic (TG) RIP-mPL1 mice (n=4-5 mice/group). **(C)** Ratio of OPG/actin mRNA by real time PCR in INS-1 cells treated with vehicle (Veh) or prolactin (PRL) for 24h (n=6). **(D)** NL and TG islets, and INS-1 cells treated with Veh or PRL for 24h, analyzed for OPG and tubulin by western blot (n=2).

### **Figure S2, related to Figure 1. Glucose homeostasis and $\beta$ -cell survival in mice treated with OPG for 7 days.**

**(A)** Body weight, **(B)** Blood glucose, **(C)** Percent  $\beta$ -cell death, **(D)** Plasma insulin, **(E)** IPGTT at day 5, (solid line with diamond represents Veh-treated, dashed lines are OPG-treated, with cross representing 0.01, triangle representing 0.05, circle representing 0.5, and square representing 1.0 $\mu$ g/g of mOPG-Fc), and **(F)** Area under the curve (AUC) for IPGTT, in mice treated with vehicle (Veh) or different concentrations of mOPG-Fc for 7 days. The body weight and blood glucose at day 0 are the average of all the mice before initiation of treatment. (n=5-15 mice/group); \*p<0.05 vs Veh.

### **Figure S3, related to Figure 1. Glucose homeostasis in mice treated with OPG for 30 days.**

**(A)** Body weight **(B)** Blood glucose, **(C)** Percent  $\beta$ -cell death (each point represents data from one mouse; 3243 $\pm$ 457  $\beta$ -cells counted/mouse), **(D)** IPGTT at day 25, **(E)** AUC for IPGTT, and **(F)** ITT at day 21, in mice treated with Vehicle or 1.0 $\mu$ g/g of mOPG-Fc every alternate day for 30 days. White bars represent vehicle-treated and black bars represent OPG-treated mice; diamond with solid line represents vehicle-treated, and square with dashed line represents OPG-treated mice. (n=5 mice/group).

**Figure S4, related to Figure 2. Gene expression and insulin content in human islets, and co-immunostaining of proliferation marker and  $\beta$ -cell transcription factor in human and rodent islets treated with OPG. (A)** Gene expression analysis by real time PCR for genes related to  $\beta$ -cell function and differentiation, relative to actin, the housekeeping gene used as internal control. (n=4-5 human islet preps) **(B)** Measurement of insulin content per islet equivalent (IEQ) in human islets treated with vehicle or 0.1 $\mu$ g/ml of hOPG-Fc for 24h. (n=3 human islet preps). **(C)** Representative images of nuclear DAPI (blue), NKX6.1 (green), and Ki67 (red) staining shown individually and merged for two human islet cell preps (H1, H2) treated with hOPG-Fc for 24h co-stained for Ki67 and NKX6.1. **(D)** [Percent Ki67/NKX6.1 double-positive cells relative to NKX6.1-positive cells in Veh- \(normalized to 1\) versus hOPG-treated human islet cells \(n=4 human islet preps\); \\*p<0.05 vs Veh.](#) **(E)** Image of OPG-treated mouse pancreatic section co-stained for DAPI (blue), Pdx1 (green), and BrdU (red) shown individually and merged. The white arrows represent double-positive cells. **(F)** [Percent BrdU/Pdx1 double-positive cells relative to Pdx1-positive cells in Veh- versus mOPG-treated pancreatic sections \(n=5-6 mice/group\); \\*p<0.05 vs Veh.](#)

**Supplemental Table 1** (related to Experimental Procedures): Human islet preps

| <b>Human Islet Preps</b> | <b>Age (years)</b> | <b>Gender</b> | <b>BMI</b> | <b>Purity (%)</b> | <b>Viability (%)</b> |
|--------------------------|--------------------|---------------|------------|-------------------|----------------------|
| AAJC32                   | 54                 | F             | 37         | 90                | 91                   |
| AAJW036A                 | 51                 | M             | 23.0       | 75                | 98                   |
| AAKT155                  | 46                 | F             | 36.9       | 90                | 90                   |
| AAL5258A                 | 61                 | M             | 37.4       | 60                | 90                   |
| ABE1387                  | 58                 | M             | 34.8       | 95                | 95                   |
| ABIK168                  | 53                 | M             | 26.4       | 73                | 98                   |
| ABI3265                  | 38                 | M             | 27.40      | 88                | 97                   |
| ACAM113                  | 18                 | M             | 27.90      | 80                | 97                   |
| ACAX261A                 | 35                 | F             | 34.80      | 90                | 90                   |
| ACBDO86                  | 53                 | M             | 20.10      | 95                | 95                   |
| ACBO251                  | 45                 | F             | 32.90      | 90                | 98                   |
| H-418                    | 59                 | F             | 22.6       | 85                | 92                   |
| H-436                    | 28                 | M             | 29.7       | 91                | 94                   |
| H-2014                   | 61                 | M             | 20.9       | 50                | 99                   |
| H-2027                   | 33                 | M             | 23.7       | 90                | 90                   |
| HP-2048                  | 40                 | M             | 23.2       | 95                | 92                   |
| HP-11310-01              | 26                 | M             | 22.7       | 90                | 95                   |
| HP-12020-01              | 56                 | M             | 30.9       | 90                | 95                   |
| HP-12076-01              | 28                 | M             | 32.0       | 85                | 98                   |
| HP-12166-01              | 46                 | M             | 26.6       | 95                | 95                   |
| HP-12133-01A             | 62                 | M             | 26.0       | 90                | 98                   |
| HP-12180-01A             | 56                 | F             | 30.1       | 95                | 95                   |
| HP-12115-01B             | 47                 | M             | 33.1       | 50                | 80                   |
| MGH-HI-105               | 42                 | M             | 34.1       | 60                | 95                   |
| ZCE-161                  | 55                 | F             | 22.3       | 80                | 94                   |

**Supplemental Table 2** (related to Experimental Procedures): Primer sequences for real time PCR

| <b>PRIMERS</b>         | <b>REVERSE</b>            | <b>FORWARD</b>           |
|------------------------|---------------------------|--------------------------|
| Actin (Human)          | CTCCTTAATGTCACGCACGAT     | CATGTACGTTGCTATCCAGGC    |
| Actin (Mouse)          | GCATGCAGAAGGAGATCACA      | TTGTTCGATTGTCGTCCTGAG    |
| Actin (Rat)            | TGGGAATGAAGATCCTCCAG      | GAGGAAGGAAAGGGCCTATG     |
| Glucagon (Human)       | TCACCAGCCAAGCAATGAAT      | GATGAACGAGGACAAGCGCC     |
| Glucokinase (Human)    | TTGATTCCAGCGAGAAAGGTG     | CTTCCCTCAGTTTTTCGGTGG    |
| Insulin (Human)        | ACAATGCCACGCTTCTGCAGGGAC  | TCACACCTGGTGGGAAGCTCTCTA |
| Isl1 (Human)           | CGTTCTTGCTGAAGCCGATG      | ATTTCCCTATGTGTTGGTTGCG   |
| Maf A (Human)          | CTCGTATTTCTCCTTGTACAGGTCC | CTTCAGCAAGGAGGAGGTCATC   |
| Maf B (Human)          | CACGCAGCCGCCGGAGTTTC      | TGAACTTTGCGCGTTAAGCC     |
| Neuro D1 (Human)       | CGGCGGAGGCTTAACGTGGA      | GACTIONGCGGCGCTAGAC      |
| Nkx6.1 (Human)         | TGCTGGACTTGTGCTTCTTCAAC   | ACACGAGACCCACTTTTTCCG    |
| Pdx1 (Human)           | TGATGTGTCTCTCGGTCAAGTT    | ACCAAAGCTCACGCGTGGAAA    |
| Rank (Mouse)           | CTTCTTCATTCCAGGTGTCCA     | GCACCCAGGAGAGGCATTAT     |
| Rank (Rat)             | ATGAGCATCTTGGACGGTGT      | CCTTGCCTGCATCACAGAC      |
| TNFRSF11B (OPG; Mouse) | TTGTGAAGCTGTGCAGGAAC      | CTGCCTGGGAAGAAGATCAG     |
| TNFRSF11B (OPG; Rat)   | CACGGCATTATCACCAACTG      | CCGGAGGCATAGAGAGACAG     |
