# Supplementary material
Source: PubMed Central journal article supplement (PMC4597781)

**Figure 1.**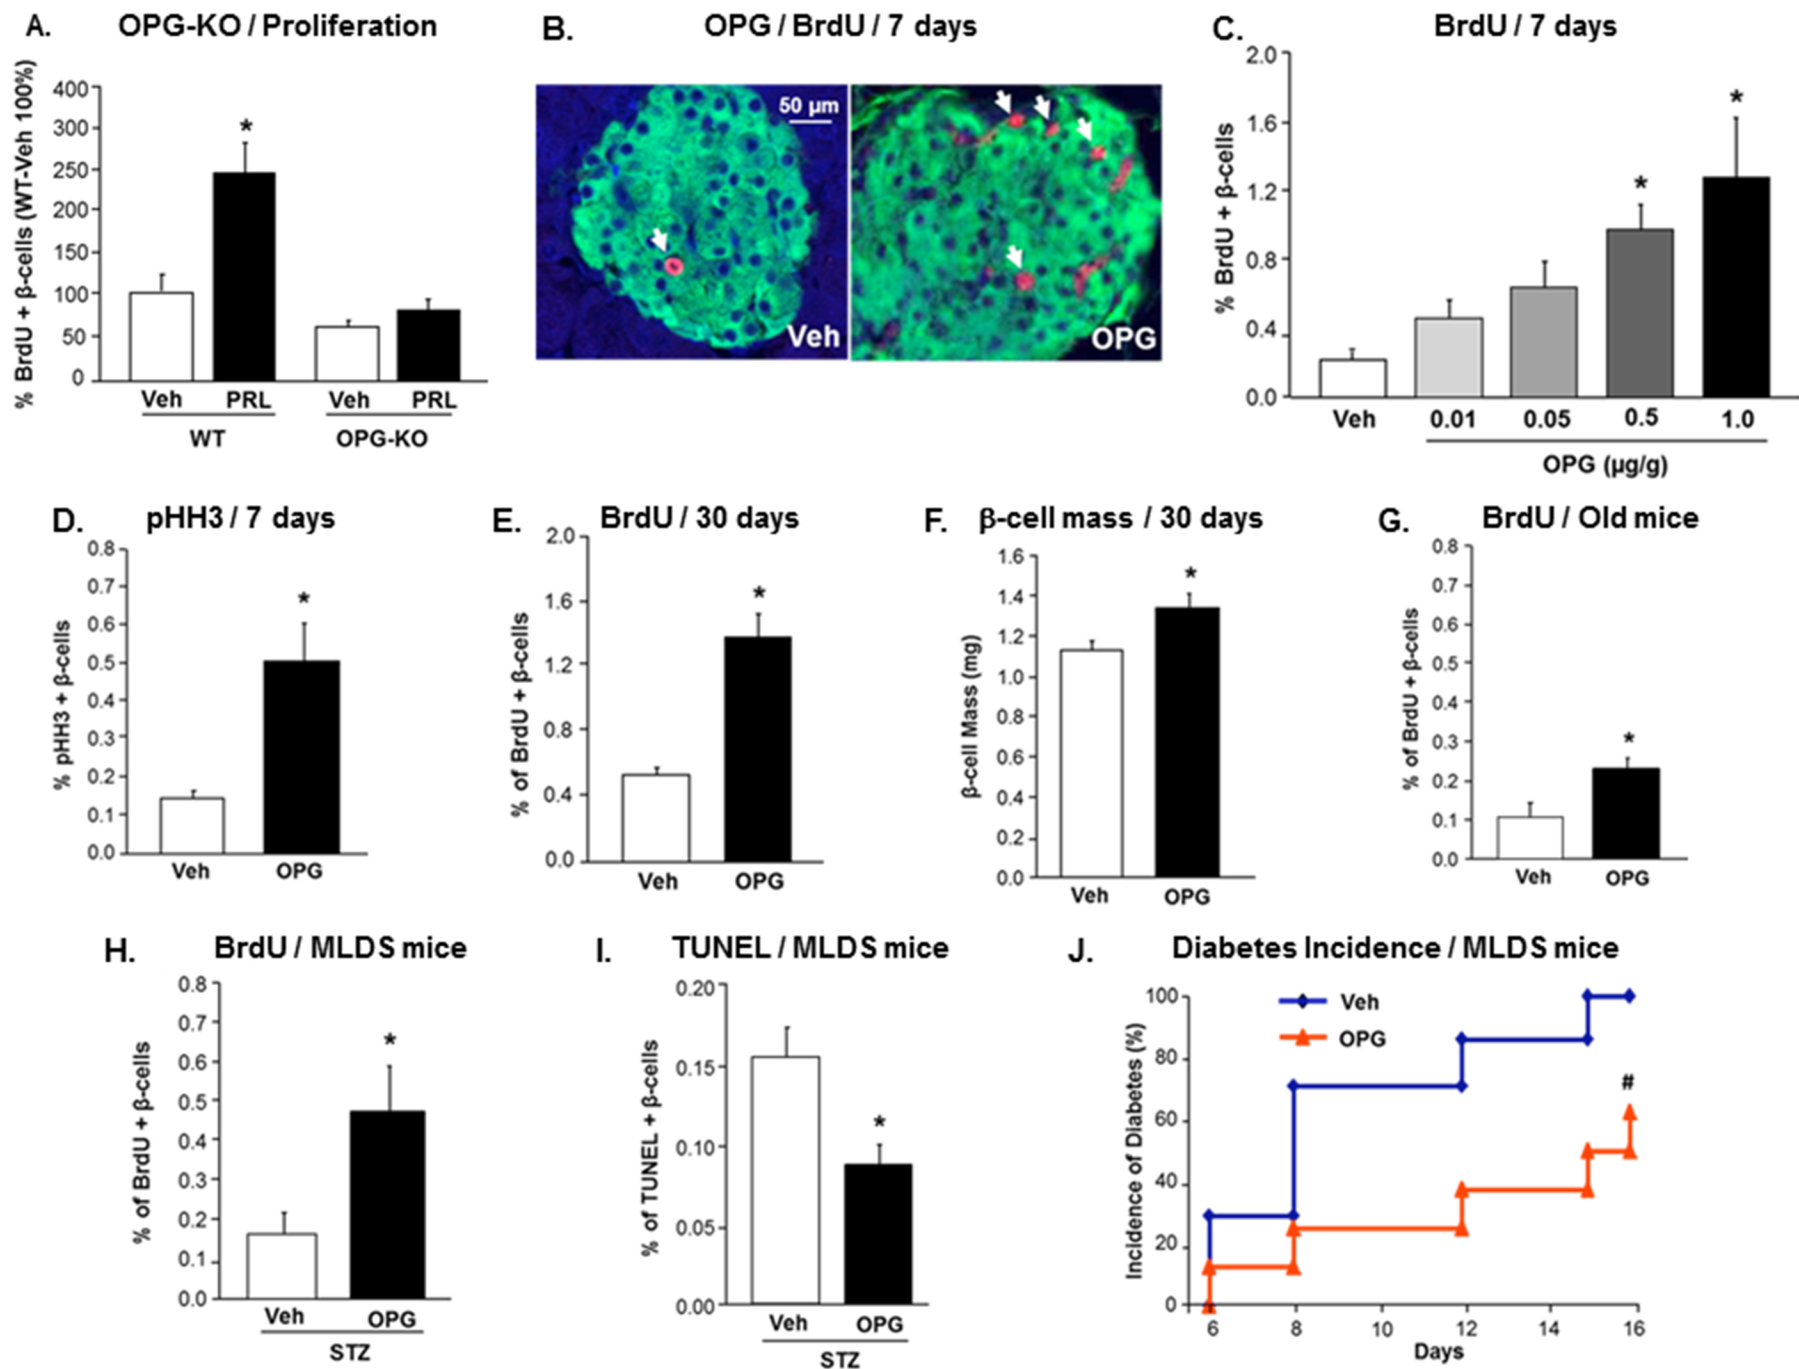

Supplement: NIHMS696096-supplement-2.pdf [file NIHMS696096-supplement-2.pdf]
